# Supplementary material
Source: PubMed Central journal article supplement (PMC2853953)

# Supporting Information

for

## Drawing the Retinal Out of its Comfort Zone: An ONIOM(QM/MM) Study of Mutant Squid Rhodopsin

Sivakumar Sekharan<sup>†</sup>, Keiji Morokuma<sup>†\*</sup>

<sup>†</sup>Cherry L. Emerson Center for Scientific Computation and Department of Chemistry, Emory University, Atlanta, Georgia 30322 and

<sup>\*</sup>Fukui Institute for Fundamental Chemistry, Kyoto University, 34-4 Takano Nishihiraki-cho, Kyoto 606-8103, Japan

### I. ONIOM (QM:MM) where QM=B3LYP/6-31G\*; MM=AMBER; optimized cartesian coordinates (in Å)

#### 1. Wildtype (WT) protonated Schiff base retinal optimized inside the protein environment.

51 atoms

|   |           |           |           |   |           |           |           |
|---|-----------|-----------|-----------|---|-----------|-----------|-----------|
| N | 9.796233  | 38.054782 | 57.858373 | C | 18.004888 | 43.701138 | 63.388020 |
| H | 8.874230  | 38.327781 | 58.190451 | H | 17.572340 | 42.835050 | 63.909033 |
| H | 9.949860  | 37.043264 | 57.784239 | H | 18.305715 | 44.399838 | 64.183154 |
| C | 17.131212 | 44.828289 | 61.316098 | C | 16.029066 | 45.291883 | 60.462118 |
| C | 18.532048 | 44.846576 | 60.654834 | H | 16.203974 | 46.156939 | 59.824983 |
| C | 18.870817 | 46.259227 | 60.126053 | C | 14.869973 | 44.599724 | 60.325323 |
| H | 19.906116 | 46.277020 | 59.772084 | H | 14.771476 | 43.680386 | 60.893245 |
| H | 18.779472 | 47.006821 | 60.922821 | C | 13.772753 | 44.876468 | 59.427957 |
| H | 18.237644 | 46.559165 | 59.284186 | C | 13.645232 | 46.232245 | 58.791031 |
| C | 18.548568 | 43.860266 | 59.463264 | H | 14.483039 | 46.425287 | 58.111967 |
| H | 18.399492 | 42.824057 | 59.788053 | H | 13.676323 | 47.020597 | 59.551211 |
| H | 19.506550 | 43.917572 | 58.932764 | H | 12.721317 | 46.331297 | 58.215712 |
| H | 17.755349 | 44.100632 | 58.751135 | C | 12.925458 | 43.821423 | 59.175028 |
| C | 16.912775 | 44.359680 | 62.574668 | H | 13.167594 | 42.897372 | 59.686577 |
| C | 15.608993 | 44.463847 | 63.332561 | C | 11.761487 | 43.797790 | 58.360372 |
| H | 15.119096 | 43.483846 | 63.410627 | H | 11.313150 | 44.752256 | 58.089777 |
| H | 14.902069 | 45.168229 | 62.891403 | C | 11.061109 | 42.678445 | 57.961636 |
| H | 15.819203 | 44.788952 | 64.362000 | H | 10.061518 | 42.853916 | 57.567039 |
| C | 19.631556 | 44.455889 | 61.667449 | C | 11.469136 | 41.306496 | 57.959251 |
| H | 19.860961 | 45.321078 | 62.302797 | C | 12.906167 | 40.878555 | 58.117623 |
| H | 20.550740 | 44.232709 | 61.115124 | H | 13.087954 | 40.474542 | 59.121559 |
| C | 19.220124 | 43.289667 | 62.561279 | H | 13.595416 | 41.701705 | 57.942621 |
| H | 18.961602 | 42.416279 | 61.948123 | H | 13.152791 | 40.094901 | 57.395900 |
| H | 20.049083 | 42.987873 | 63.210366 | C | 10.472504 | 40.349016 | 57.793664 |
|   |           |           |           | H | 9.437313  | 40.675394 | 57.796475 |
|   |           |           |           | C | 10.729282 | 38.979201 | 57.692339 |
|   |           |           |           | H | 11.721453 | 38.619755 | 57.440379 |

**2. Demethyl (DM) protonated Schiff base retinal optimized inside the protein environment.**

36 atoms

|   |           |           |           |
|---|-----------|-----------|-----------|
| N | 9.915745  | 38.080057 | 58.002919 |
| H | 9.020141  | 38.208349 | 58.488824 |
| H | 10.192285 | 37.099237 | 57.883151 |
| C | 17.186128 | 44.717314 | 61.187811 |
| C | 18.621500 | 44.930456 | 60.736518 |
| H | 18.737739 | 45.952250 | 60.349759 |
| H | 18.816066 | 44.273244 | 59.876336 |
| C | 16.882991 | 44.162850 | 62.383152 |
| H | 15.838511 | 44.087938 | 62.679825 |
| C | 19.650854 | 44.658283 | 61.844471 |
| H | 19.703863 | 45.530039 | 62.508804 |
| H | 20.645603 | 44.539774 | 61.402508 |
| C | 19.263020 | 43.423172 | 62.668098 |
| H | 19.178659 | 42.553239 | 62.001217 |
| H | 20.038917 | 43.184410 | 63.401498 |
| C | 17.909136 | 43.648094 | 63.353356 |
| H | 17.536802 | 42.724323 | 63.815716 |
| H | 18.012697 | 44.367390 | 64.182718 |
| C | 16.120213 | 45.111653 | 60.267981 |
| H | 16.258466 | 46.017334 | 59.675557 |
| C | 15.015524 | 44.344205 | 60.072249 |
| H | 14.976640 | 43.386970 | 60.585310 |
| C | 13.891377 | 44.638123 | 59.240499 |
| H | 13.780824 | 45.645314 | 58.837810 |
| C | 12.963336 | 43.672221 | 58.955792 |
| H | 13.165567 | 42.675341 | 59.340811 |
| C | 11.720235 | 43.869744 | 58.298236 |
| H | 11.409444 | 44.895116 | 58.108652 |
| C | 10.827360 | 42.858264 | 58.010018 |
| H | 9.799631  | 43.122391 | 57.770003 |
| C | 11.178349 | 41.482803 | 57.963395 |
| H | 12.234441 | 41.237911 | 57.871462 |
| C | 10.281601 | 40.437824 | 57.987568 |
| H | 9.232048  | 40.618786 | 58.192712 |
| C | 10.705225 | 39.113830 | 57.787550 |
| H | 11.704031 | 38.913537 | 57.399489 |

**3. Deprotonated Schiff base retinal optimized in the presence of protonated Glu180 counterion inside the protein environment (SBR<sup>cip</sup>)**

50 atoms

|   |           |           |           |
|---|-----------|-----------|-----------|
| N | 9.695676  | 38.104006 | 57.472643 |
| H | 9.896399  | 37.085265 | 57.492339 |
| C | 17.142197 | 44.840839 | 61.322339 |
| C | 18.537437 | 44.886512 | 60.649560 |
| C | 18.869412 | 46.320741 | 60.175676 |
| H | 19.898806 | 46.355960 | 59.803229 |
| H | 18.790147 | 47.035319 | 61.003600 |
| H | 18.218396 | 46.651346 | 59.359770 |
| C | 18.548482 | 43.957192 | 59.414113 |
| H | 18.410323 | 42.906373 | 59.695109 |
| H | 19.500288 | 44.047122 | 58.875884 |
| H | 17.742954 | 44.227186 | 58.727260 |
| C | 16.948504 | 44.344800 | 62.571324 |
| C | 15.655792 | 44.427810 | 63.351369 |
| H | 15.167137 | 43.446407 | 63.419088 |
| H | 14.943036 | 45.138064 | 62.928922 |
| H | 15.879222 | 44.735692 | 64.384314 |
| C | 19.652847 | 44.457969 | 61.629526 |
| H | 19.896111 | 45.299969 | 62.289661 |
| H | 20.563550 | 44.250361 | 61.055592 |
| C | 19.251242 | 43.266028 | 62.492279 |
| H | 18.980288 | 42.413786 | 61.854358 |
| H | 20.089923 | 42.940872 | 63.118354 |
| C | 18.049068 | 43.654809 | 63.349372 |
| H | 17.622275 | 42.770841 | 63.844687 |
| H | 18.366095 | 44.320872 | 64.165830 |
| C | 16.021802 | 45.309384 | 60.479890 |
| H | 16.177619 | 46.199772 | 59.873269 |
| C | 14.878477 | 44.602654 | 60.326615 |
| H | 14.792216 | 43.678847 | 60.890794 |
| C | 13.762184 | 44.866560 | 59.431252 |
| C | 13.655819 | 46.212230 | 58.762136 |
| H | 14.492785 | 46.385489 | 58.075885 |
| H | 13.697043 | 47.019562 | 59.503385 |
| H | 12.728659 | 46.310499 | 58.190294 |
| C | 12.901654 | 43.828159 | 59.210696 |
| H | 13.119538 | 42.922764 | 59.764682 |
| C | 11.733866 | 43.776529 | 58.364853 |

|   |           |           |           |
|---|-----------|-----------|-----------|
| H | 11.280078 | 44.727719 | 58.091937 |
| C | 11.080563 | 42.663374 | 57.921469 |
| H | 10.124490 | 42.837087 | 57.429238 |
| C | 11.451691 | 41.255954 | 57.982777 |
| C | 12.853410 | 40.839465 | 58.375143 |
| H | 12.924930 | 40.645042 | 59.450773 |
| H | 13.576298 | 41.614817 | 58.116429 |
| H | 13.157662 | 39.922247 | 57.867063 |
| C | 10.509448 | 40.330818 | 57.647610 |
| H | 9.515127  | 40.661127 | 57.362066 |
| C | 10.679438 | 38.891418 | 57.713503 |
| H | 11.679470 | 38.538137 | 57.997315 |

|   |           |           |           |
|---|-----------|-----------|-----------|
| H | 14.933579 | 45.140923 | 62.900436 |
| H | 15.850686 | 44.740994 | 64.369247 |
| C | 19.657695 | 44.471417 | 61.652232 |
| H | 19.892940 | 45.316169 | 62.311891 |
| H | 20.574564 | 44.263130 | 61.088135 |
| C | 19.249861 | 43.281478 | 62.515152 |
| H | 18.984363 | 42.428025 | 61.876925 |
| H | 20.083826 | 42.957934 | 63.148427 |
| C | 18.039647 | 43.670325 | 63.360896 |
| H | 17.610682 | 42.786374 | 63.854548 |
| H | 18.347664 | 44.339481 | 64.178975 |
| C | 16.033319 | 45.310586 | 60.469891 |
| H | 16.178104 | 46.213719 | 59.879503 |
| C | 14.904934 | 44.585004 | 60.298316 |
| H | 14.836255 | 43.648944 | 60.845188 |
| C | 13.779194 | 44.849069 | 59.415816 |
| C | 13.660918 | 46.200716 | 58.760169 |
| H | 14.492700 | 46.383826 | 58.070052 |
| H | 13.701575 | 47.003217 | 59.507403 |
| H | 12.730315 | 46.297322 | 58.193692 |
| C | 12.918350 | 43.810998 | 59.198773 |
| H | 13.150493 | 42.896889 | 59.733537 |
| C | 11.730271 | 43.767989 | 58.381548 |
| H | 11.273048 | 44.721760 | 58.123960 |
| C | 11.064292 | 42.657670 | 57.952668 |
| H | 10.095598 | 42.835468 | 57.486900 |
| C | 11.437956 | 41.249378 | 57.988567 |
| C | 12.858898 | 40.820301 | 58.292459 |
| H | 12.976869 | 40.540833 | 59.346188 |
| H | 13.566072 | 41.619359 | 58.067533 |
| H | 13.148280 | 39.955777 | 57.692369 |
| C | 10.471507 | 40.333794 | 57.702600 |
| H | 9.460932  | 40.670492 | 57.489006 |
| C | 10.649305 | 38.893780 | 57.720160 |
| H | 11.675342 | 38.540642 | 57.871286 |

**4. Deprotonated Schiff base retinal optimized in the presence of deprotonated Glu180 counterion inside the protein environment (SBR<sup>cidp</sup>)**

50 atoms

|   |           |           |           |
|---|-----------|-----------|-----------|
| N | 9.643853  | 38.109596 | 57.571046 |
| H | 9.856519  | 37.092673 | 57.550323 |
| C | 17.150058 | 44.847725 | 61.320925 |
| C | 18.550389 | 44.894188 | 60.660561 |
| C | 18.881675 | 46.328078 | 60.184870 |
| H | 19.913036 | 46.365231 | 59.817857 |
| H | 18.795680 | 47.044823 | 61.010636 |
| H | 18.233364 | 46.654550 | 59.365209 |
| C | 18.574603 | 43.960646 | 59.428503 |
| H | 18.437786 | 42.910532 | 59.712100 |
| H | 19.530578 | 44.051690 | 58.897831 |
| H | 17.773638 | 44.223834 | 58.734024 |
| C | 16.945524 | 44.354835 | 62.569040 |
| C | 15.642558 | 44.432844 | 63.332854 |
| H | 15.155465 | 43.449993 | 63.392351 |

**II. Geometric parameters of Wildtype (WT) protonated Schiff base retinal, Demethyl (DM) protonated Schiff base retinal, deprotonated Schiff base retinal in the presence of a) protonated Glu180 counterion (SBR<sup>cip</sup>) and b) deprotonated Glu180 counterion (SBR<sup>cidp</sup>).**

**Bond lengths (Å)**

| <b>Bonds</b> | <b>WT</b> | <b>DM</b> | <b>SBR<sup>cip</sup></b> | <b>SBR<sup>cidp</sup></b> |
|--------------|-----------|-----------|--------------------------|---------------------------|
| C5–C6        | 1.361     | 1.352     | 1.358                    | 1.357                     |
| C6–C7        | 1.469     | 1.462     | 1.478                    | 1.478                     |
| C7–C8        | 1.357     | 1.359     | 1.353                    | 1.352                     |
| C8–C9        | 1.444     | 1.429     | 1.455                    | 1.455                     |
| C9–C10       | 1.377     | 1.369     | 1.367                    | 1.366                     |
| C10–C11      | 1.421     | 1.420     | 1.443                    | 1.443                     |
| C11–C12      | 1.379     | 1.380     | 1.365                    | 1.364                     |
| C12–C13      | 1.431     | 1.420     | 1.457                    | 1.457                     |
| C13–C14      | 1.391     | 1.377     | 1.362                    | 1.362                     |
| C14–C15      | 1.397     | 1.405     | 1.451                    | 1.451                     |
| C15–N16      | 1.324     | 1.318     | 1.283                    | 1.284                     |

**Bond angles (°)**

| <b>Bonds</b> | <b>WT</b> | <b>DM</b> | <b>SBR<sup>cip</sup></b> | <b>SBR<sup>cidp</sup></b> |
|--------------|-----------|-----------|--------------------------|---------------------------|
| C5–C6–C7     | 121.748   | 120.220   | 122.142                  | 121.949                   |
| C6–C7–C8     | 122.567   | 122.060   | 122.656                  | 122.364                   |
| C7–C8–C9     | 127.903   | 127.375   | 128.557                  | 128.704                   |
| C8–C9–C10    | 115.826   | 120.603   | 116.396                  | 116.499                   |
| C9–C10–C11   | 128.475   | 126.254   | 129.157                  | 129.176                   |
| C10–C11–C12  | 126.459   | 124.142   | 127.380                  | 127.193                   |
| C11–C12–C13  | 129.361   | 123.845   | 130.720                  | 130.820                   |
| C12–C13–C14  | 117.101   | 124.981   | 118.003                  | 117.554                   |
| C13–C14–C15  | 123.500   | 121.089   | 125.557                  | 125.294                   |
| C14–C15–N16  | 123.102   | 122.360   | 120.699                  | 120.584                   |

**Dihedral angle (°)**

| <b>Bonds</b>    | <b>WT</b> | <b>DM</b> | <b>SBR<sup>cip</sup></b> | <b>SBR<sup>cidp</sup></b> |
|-----------------|-----------|-----------|--------------------------|---------------------------|
| C5–C6–C7–C8     | -45.525   | -40.891   | -46.107                  | -47.181                   |
| C6–C7–C8–C9     | -173.494  | 177.762   | -172.954                 | -174.361                  |
| C7–C8–C9–C10    | 160.078   | 168.350   | 163.141                  | 165.028                   |
| C8–C9–C10–C11   | 178.902   | 171.088   | -178.694                 | -179.000                  |
| C9–C10–C11–C12  | 168.896   | 178.694   | 163.349                  | 164.304                   |
| C10–C11–C12–C13 | -17.328   | -19.388   | 169.584                  | 168.841                   |
| C11–C12–C13–C14 | 165.790   | 164.178   | 169.803                  | 168.555                   |
| C12–C13–C14–C15 | 176.110   | 172.812   | -176.787                 | -178.450                  |
| C13–C14–C15–N16 | 163.185   | 169.516   | 174.627                  | 172.749                   |

**III.** WS2 system corresponds to the inclusion of two internal water molecules (W1, W2) near the SB binding region. In this model, W1 forms an H-bond with SB nitrogen and Asn87, and W2 forms an H-bond with W1 and backbone oxygen atom of Tyr111 thus bringing the key distance between SB nitrogen and potential H-bonding residues (Asn87, Tyr111) within 0.5 Å deviation and also in good agreement with the X-ray data.

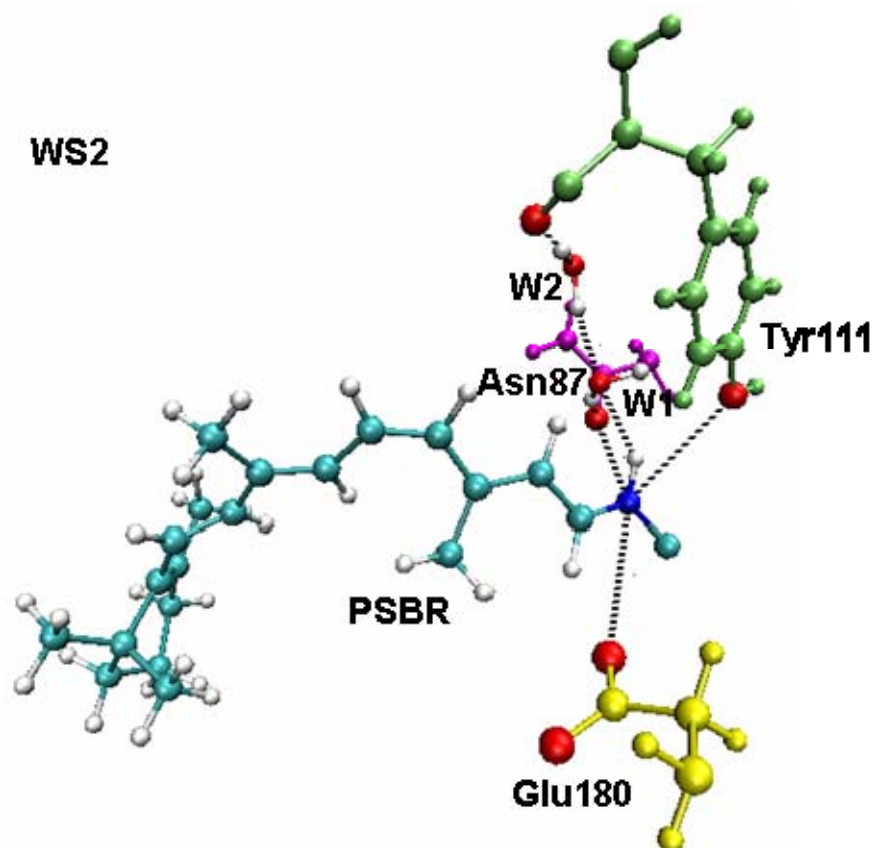

Supplement: NIHMS172533-supplement-SI.pdf [file NIHMS172533-supplement-SI.pdf]
